# Supplementary material for: Metallic MoO2cocatalyst significantly enhances visible-light photocatalytic hydrogen production over MoO2/Zn0.5Cd0.5S heterojunction
Source: Royal Society of Chemistry journal article supplement (doi:10.1039/c4nr06949h), 2015-01-01
Supplement: c4nr06949h1.pdf [file c4nr06949h1.pdf]

## Supporting Information

### **Metallic MoO<sub>2</sub> Cocatalyst Significantly Enhanced Visible-Light Photocatalytic Hydrogen Production over MoO<sub>2</sub>/Zn<sub>0.5</sub>Cd<sub>0.5</sub>S Heterojunction**

Hong Du,<sup>a,b</sup> Xiao Xie,<sup>a</sup> Qing Zhu,<sup>a</sup> Ling Lin,<sup>a</sup> Yi-Fan Jiang,<sup>a</sup> Zheng-Kun Yang,<sup>a</sup>

Xiao Zhou,<sup>a</sup> and An-Wu Xu<sup>a,\*</sup>

<sup>a</sup> *Division of Nanomaterials and Chemistry, Hefei National Laboratory for Physical Sciences at Microscale, Department of Chemistry, University of Science and Technology of China, Hefei 230026, China*

<sup>b</sup> *College of Chemistry and Chemical Engineering, Xinjiang Normal University, Urumqi 830054, China*

\* *Address correspondence to [anwuxu@ustc.edu.cn](mailto:anwuxu@ustc.edu.cn) (A.W. X.)*

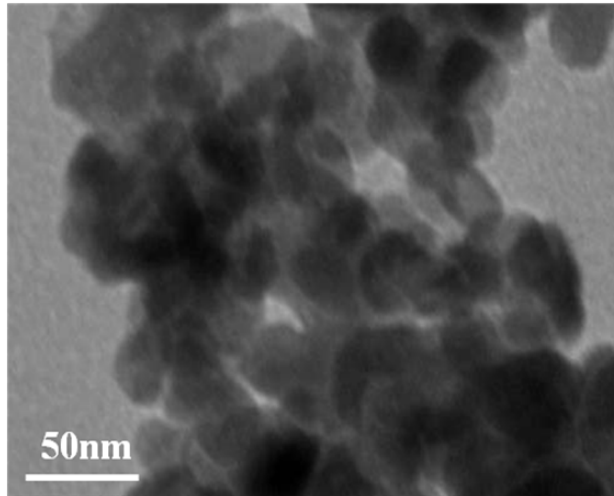

**Fig. S1** TEM image of MoO<sub>2</sub> nanoparticles.

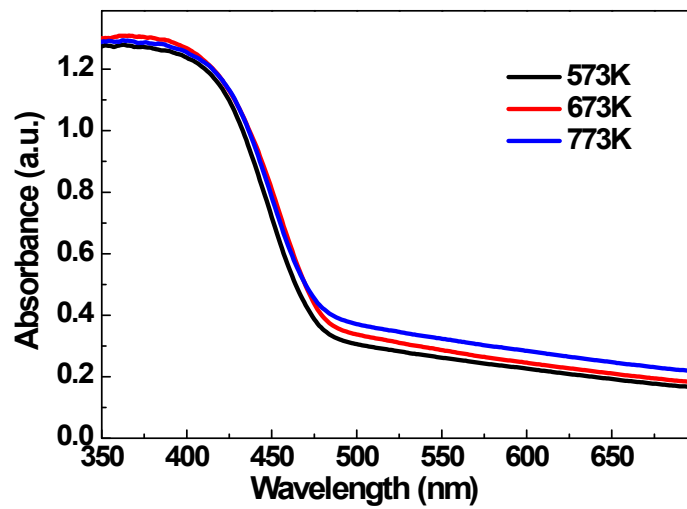

**Fig. S2** The UV-vis diffuse reflectance spectra for MoO<sub>2</sub> (2.0 wt %)/Zn<sub>0.5</sub>Cd<sub>0.5</sub>S prepared at different temperatures.

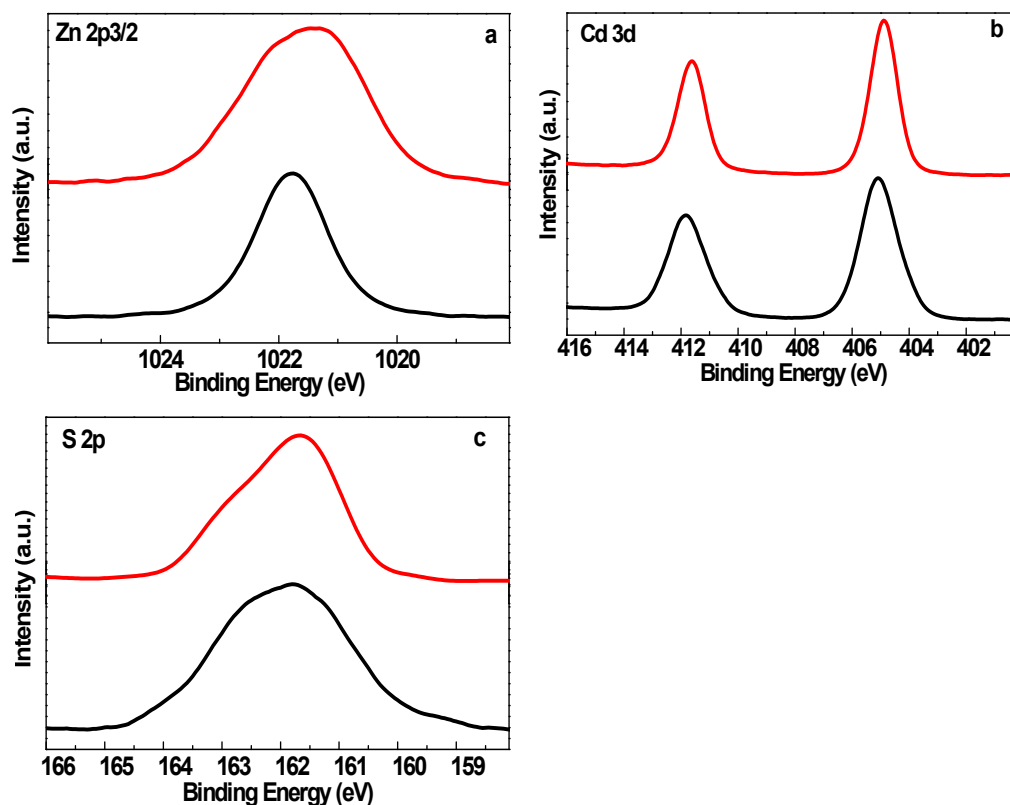

**Fig. S3** XPS spectra of samples before (black line) and after loading of MoO<sub>2</sub> (red line) : (a) Zn 2p<sub>3/2</sub> XPS spectrum, (b) Cd 3d XPS spectrum, (c) S 2p XPS spectrum.

**Table S1** BET surface areas and pore volumes of the samples calcined at the specified temperatures

|                                  |       |       |       |
|----------------------------------|-------|-------|-------|
| Treating Temp (K)                | 573   | 673   | 773   |
| Surface Area (m <sup>2</sup> /g) | 25    | 21    | 12    |
| Pore Volume (cm <sup>3</sup> /g) | 0.196 | 0.178 | 0.102 |

Table S1 shows that the BET surface area and pore volume of the MoO<sub>2</sub>/Zn<sub>0.5</sub>Cd<sub>0.5</sub>S sample calcined at 773 K are different from those of the sample calcined at 673 and 573 K. The BET surface areas and pore volumes decrease significantly with increasing calcination temperature. It is noted that H<sub>2</sub> evolution rate of MoO<sub>2</sub> (2 wt%)/Zn<sub>0.5</sub>Cd<sub>0.5</sub>S hybrid photocatalyst calcined at 573 K (130.3 μmol h<sup>-1</sup>) is lower than that calcined at 673 K (252.4 μmol h<sup>-1</sup>) under visible light irradiation (see Fig. 6). This can be explained that the hybrid photocatalyst calcined at 673 K

contain more heterojunction between the MoO<sub>2</sub> and Zn<sub>0.5</sub>Cd<sub>0.5</sub>S, for efficient charge carrier transfer and separation, high crystallinity for decreasing photogenerated e/h recombination. Further increase of the annealing temperature to 773 K reduced the rate of H<sub>2</sub> evolution to 184.4 μmol h<sup>-1</sup> for MoO<sub>2</sub>/Zn<sub>0.5</sub>Cd<sub>0.5</sub>S catalyst, which could be ascribed to the drastic decrease of the surface area and pore volume.

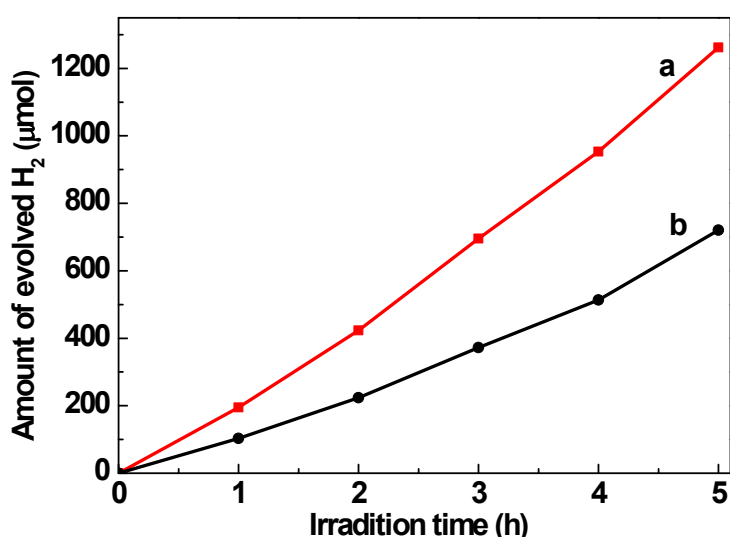

**Fig. S4** Time courses of photocatalytic H<sub>2</sub> evolution from water solution on MoO<sub>2</sub> (2 wt%)/Zn<sub>0.5</sub>Cd<sub>0.5</sub>S hybrid photocatalyst (a) and Pt (0.5 wt%)/Zn<sub>0.5</sub>Cd<sub>0.5</sub>S (b) under visible light irradiation. Reaction conditions: catalyst, 0.1 g; 100 ml aqueous solution containing 0.1 M Na<sub>2</sub>S and 0.1 M Na<sub>2</sub>SO<sub>3</sub>, and light source, 300 W xenon lamp ( $\lambda \geq 420$  nm).

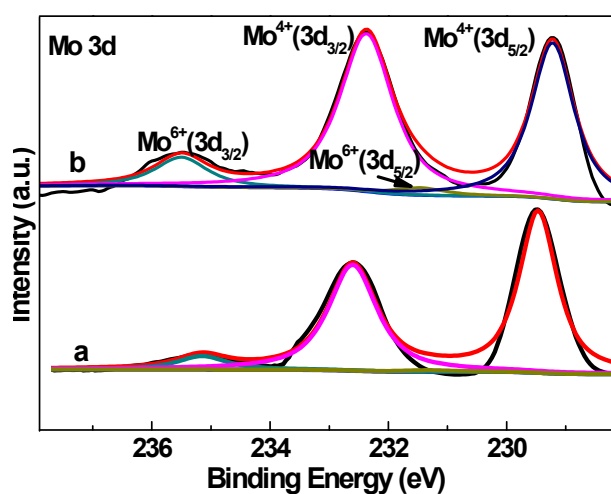

**Fig. S5** Mo 3d XPS spectra of MoO<sub>2</sub> (2 wt%)/Zn<sub>0.5</sub>Cd<sub>0.5</sub>S before (a) and after (b) photocatalytic reactions.

Table S2 XPS area ratios of chemical states of Mo species for MoO<sub>2</sub> (2 wt%)/Zn<sub>0.5</sub>Cd<sub>0.5</sub>S before and after photocatalytic reactions.

| Samples                                                          | Mo <sup>4+</sup> area ratio (%) | Mo <sup>6+</sup> area ratio (%) |
|------------------------------------------------------------------|---------------------------------|---------------------------------|
| MoO <sub>2</sub> /Zn <sub>0.5</sub> Cd <sub>0.5</sub> S (unused) | 93.9%                           | 6.1%                            |
| MoO <sub>2</sub> /Zn <sub>0.5</sub> Cd <sub>0.5</sub> S (used)   | 91.7%                           | 8.3%                            |

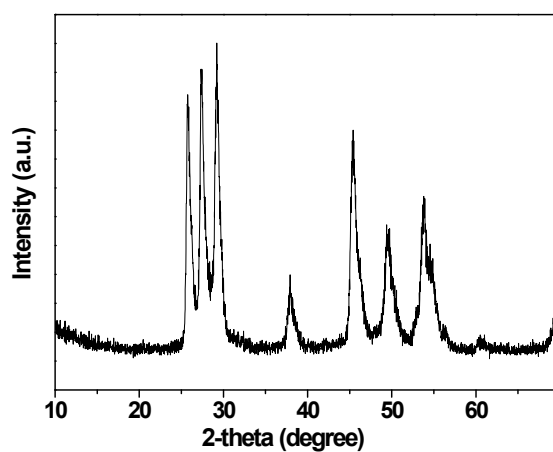

**Fig. S6** Powder X-ray diffraction pattern for MoO<sub>2</sub> (2 wt%)/Zn<sub>0.5</sub>Cd<sub>0.5</sub>S hybrid after serving as catalysts for a 20 h H<sub>2</sub> evolution.
